# Supplementary material
Source: publisher figshare collection journal article supplement (https://tandf.figshare.com/ndownloader/files/17722442)
Supplement: Supplementary file 1 [file 17722442]

**Table 2 Selected bond lengths (Å) and angles (°) for compound** 1

| **Bond** | **Dist.** | **Bond** | **Dist.** |
| --- | --- | --- | --- |
| Co(1)-O(1) | 2.266(6) | Co(1)-O(2) | 2.079(6) |
| Co(1)-O(6)#3 | 1.968(6) | Co(1)-O(3)#2 | 2.027(6) |
| Co(1)-O(4)#1 | 2.019(6) | Co(2)-O(2) | 2.180(5) |
| Co(2)-O(1w) | 2.118(6) | Co(2)-O(5)#3 | 2.011(5) |
| Co(2)-O(2)#4 | 2.180(6) | Co(2)-O(1w)#4 | 2.118(6) |
| Co(2)-O(5)#5 | 2.011(5) |  |  |
| **Angle** | **(°)** | **Angle** | **(°)** |
| O(1)-Co(1)-O(2) | 59.8(2) | O(1)-Co(1)-O(6)#3 | 162.2(2) |
| O(1)-Co(1)-O(6)#2 | 85.1(3) | O(1)-Co(1)-O(3)#2 | 81.6(3) |
| O(1)-Co(1)-O(4)#1 | 103.6(2) | O(2)-Co(1)-O(6)#3 | 110.2(3) |
| O(2)-Co(1)-O(3)#2 | 114.8(2) | O(2)-Co(1)-O(4)#1 | 96.0(3) |
| O(6)#3-Co(1)-O(3)#2 | 113.2(3) | O(6)#3-Co(1)-O(4)#1 | 116.8(2) |
| O(3)#2-Co(1)-O(4)#1 | 81.6(3) | O(2)-Co(2)-O(1w) | 85.4(3) |
| O(2)-Co(2)-O(5)#3 | 88.3(2) | O(2)-Co(2)-O(2)#4 | 180.0(2) |
| O(2)-Co(2)-O(1w)#4 | 94.6(3) | O(2)-Co(2)-O(5)#5 | 91.7(2) |
| O(1w)-Co(2)-O(5)#3 | 94.5(2) | O(1w)-Co(2)-O(2)#4 | 94.6(3) |
| O(1w)-Co(2)-O(1w)#4 | 180.0(3) | O(1w)-Co(2)-O(5)#5 | 85.5(2) |
| O(5)#3-Co(2)-O(2)#4 | 91.7(2) | O(5)#3-Co(2)-O(1w)#4 | 85.5(2) |
| O(5)#3-Co(2)-O(5)#5 | 180.0(3) | O(2)#4-Co(2)-O(1w)#4 | 85.4(3) |
| O(2)#4-Co(2)-O(5)#5 | 88.3(2) | O(1w)#4-Co(2)-O(5)#5 | 94.5(2) |

Symmetry codes: (#1) –0.5 + *x*, 1.5 – *y*, –0.5 + *z*; (#2) 0.5 – *x*, –0.5 + *y*, 0.5 – *z*; (#3) –0.5 + *x*, 0.5 – *y*, –0.5 + *z*; (#4) 0.5 – *x*, 0.5 – *y*, –*z*; (#5) 1 – *x*, *y*, 0.5 – *z*.


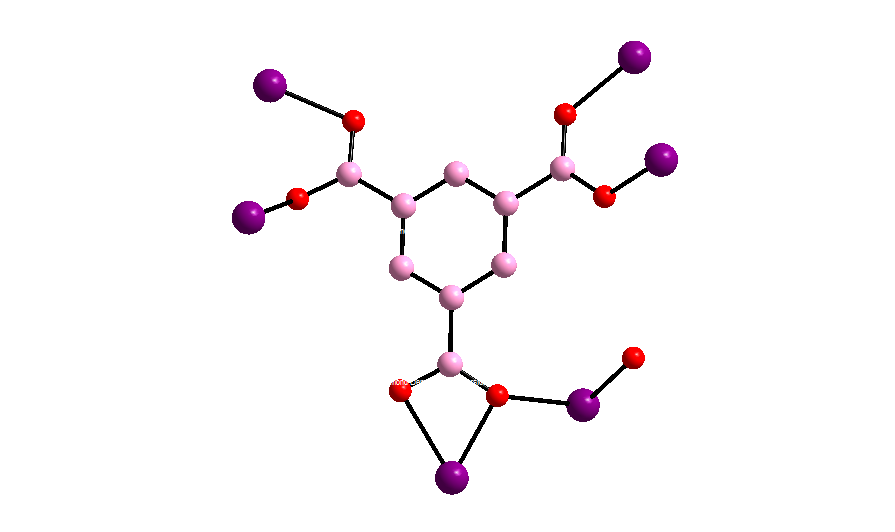


**Fig. S1.** The coordination mode for btc3- ligand.
